# Supplementary material for: Investigation of the properties of nanographene in polymer nanocomposites through molecular simulations: dynamics and anisotropic Brownian motion
Source: Royal Society of Chemistry journal article supplement (doi:10.1039/c9cp02074h), 2019-01-01
Supplement: c9cp02074h1.pdf [file c9cp02074h1.pdf]

# Supporting Information

## Properties of Nanographene in Polymer Nanocomposites through Molecular Simulations: Dynamics and Anisotropic Brownian Motion

**Anastassia N. Rissanou<sup>1\*</sup>, Petra Bačová<sup>1</sup> and Vagelis Harmandaris<sup>1,2\*</sup>**

1. Institute of Applied and Computational Mathematics (IACM), Foundation for Research and Technology Hellas, (FORTH), IACM/FORTH, GR-71110 Heraklion, Greece.
2. Department of Mathematics and Applied Mathematics, University of Crete, GR-71409, Heraklion, Crete, Greece.

**Keywords:** Brownian motion, Anisotropic diffusion, Molecular Dynamics, Pristine – Functionalized Graphene

---

\* Author to whom correspondence should be addressed:  
[risanou@uoc.gr](mailto:risanou@uoc.gr) +30 2810393746 fax: +30 2810393701  
[harman@uoc.gr](mailto:harman@uoc.gr) +30 2810393735 fax: +30 2810393701

## Atomistic Force Field

Simulations were performed with the GROMACS simulation package.<sup>1</sup> United atom models are applied for both polymers, PE and PEO based on the TraPPE force field,<sup>2</sup> which has been slightly modified in the case of PEO.<sup>3</sup> Non-bonded interactions between polymer atoms, as well as between the carbons of graphene and polymer atoms, are described by a spherically truncated 6-12 Lennard-Jones potential. Standard Lorentz- Berthelot mixing rules were used. Concerning the model graphene sheets we applied a force field previously used for various carbon structures<sup>4,5</sup> whereas, for the functional groups grafted on the graphene edges, the OPLS-AA force field was utilized.<sup>6</sup> Note that the OPLS force field uses scaling factors 0.5 for the 1-4 interactions, which is not the case of the graphene force field. Therefore, the parameters for this type of interaction were adapted in the way as it was done for the proteins in ref.<sup>7</sup> Table SI-1 contains  $\epsilon$  and  $\sigma$  parameters for all atoms of the systems whereas, all bonded parameters are included in Table SI-2.

**Table SI-1.** Model parameters and functional forms of all non-bonded interactions of the atomistic force field used here.

| <b>Non-Bonded Interactions</b>                                                                                                                            |                     |                                 |                                           |                                 |
|-----------------------------------------------------------------------------------------------------------------------------------------------------------|---------------------|---------------------------------|-------------------------------------------|---------------------------------|
| $V_{LJ}(r_{ij}) = 4\epsilon_{ij} \left[ \left( \frac{\sigma_{ij}}{r_{ij}} \right)^{12} - \left( \frac{\sigma_{ij}}{r_{ij}} \right)^6 \right], r \leq R_c$ |                     |                                 |                                           |                                 |
| <b>Atom Types</b>                                                                                                                                         | <b>mass (g/mol)</b> | <b><math>\sigma</math> (nm)</b> | <b><math>\epsilon</math> (kJoule/mol)</b> | <b>Atom Description</b>         |
| CH2                                                                                                                                                       | 14.027              | 0.395                           | 0.382465                                  | united atom of polymer          |
| CH3                                                                                                                                                       | 15.035              | 0.375                           | 0.814818                                  | terminal united atom of polymer |
| OM                                                                                                                                                        | 15.9994             | 0.28                            | 0.457296                                  | oxygen of PEO                   |
| CGR                                                                                                                                                       | 12.011              | 0.347                           | 0.275                                     | carbon of graphene              |
| CGRC                                                                                                                                                      | 12.011              | 0.355                           | 0.29288                                   | functionalized carbon atom      |
| CX                                                                                                                                                        | 12.011              | 0.375                           | 0.43932                                   | carbon of carboxyl group        |
| O                                                                                                                                                         | 15.9994             | 0.296                           | 0.87864                                   | Oxygen                          |
| OH                                                                                                                                                        | 15.9994             | 0.3                             | 0.71128                                   | oxygen of carboxyl group        |
| HO                                                                                                                                                        | 1.008               | 0.0                             | 0.0                                       | hydrogen of carboxyl group      |
| H                                                                                                                                                         | 1.008               | 0.242                           | 0.12552                                   | hydrogen                        |

**Table SI-2.** Model parameters and functional forms of all bonded interactions of the atomistic force field used here.

| <b>Bonded Interactions</b>                                                              |                                    |                                               |
|-----------------------------------------------------------------------------------------|------------------------------------|-----------------------------------------------|
| $V_b(r_{ij}) = \frac{1}{2} k_{ij}^b (r_{ij} - b_{ij})^2$                                |                                    |                                               |
| <b>Bond</b>                                                                             | <b>b (nm)</b>                      | <b>k<sup>b</sup> (kJ/mol·nm<sup>2</sup>)</b>  |
| CH2 -CH2                                                                                | 0.154                              | 217700                                        |
| CH2-OM                                                                                  | 0.141                              | 267900                                        |
| CH3-OM                                                                                  | 0.141                              | 267900                                        |
| CGR-CGR                                                                                 | 0.1418                             | 478.9                                         |
| CGRC-CGR                                                                                | 0.1418                             | 478.9                                         |
| CGRC-CGRC                                                                               | 0.1418                             | 478.9                                         |
| CX-CGRC                                                                                 | 0.149                              | 334720                                        |
| CX-O                                                                                    | 0.1229                             | 476976                                        |
| CX-OH                                                                                   | 0.1364                             | 376560                                        |
| HO-OH                                                                                   | 0.0945                             | 462750.4                                      |
| CGRC-H                                                                                  | 0.108                              | 307105.6                                      |
| $V_\alpha(\theta_{ijk}) = \frac{1}{2} k_{ijk}^\theta (\theta_{ijk} - \theta_{ijk}^0)^2$ |                                    |                                               |
| <b>Angle</b>                                                                            | <b><math>\theta^0</math> (deg)</b> | <b>k<sup>0</sup> (kJ/mol*rad<sup>2</sup>)</b> |
| CH2-CH2-OM                                                                              | 112                                | 418.218                                       |
| CH2-OM-CH2                                                                              | 112                                | 502.194                                       |
| CH3-OM-CH2                                                                              | 112                                | 502.194                                       |
| CGR-CGR-CGR                                                                             | 120                                | 562.2                                         |
| CGR-CGR-CGRC                                                                            | 120                                | 562.2                                         |
| CGR-CGRC-CGR                                                                            | 120                                | 562.2                                         |
| CGRC-CGR-CGRC                                                                           | 120                                | 562.2                                         |
| CGRC-CGRC-CGR                                                                           | 120                                | 562.2                                         |
| CGRC-CGRC-CGRC                                                                          | 120                                | 562.2                                         |
| CX-OH-HO                                                                                | 113                                | 292.88                                        |
| CGRC-CX-OH                                                                              | 120                                | 585.76                                        |
| CGRC-CX-O                                                                               | 120.4                              | 669.44                                        |
| CX-CGRC-CGR                                                                             | 120                                | 711.28                                        |
| CX-CGRC-CGRC                                                                            | 120                                | 711.28                                        |
| O-CX-OH                                                                                 | 121                                | 669.44                                        |
| CGR-CGRC-H                                                                              | 120                                | 292.88                                        |
| CGRC-CGRC-H                                                                             | 120                                | 292.88                                        |

$$V_{rb}(\varphi_{ijkl}) = \sum_{n=0}^5 C_n (\cos(\psi))^n$$

| Dihedral           | C <sub>0</sub> (KJ/mol) | C <sub>1</sub> (KJ/mol) | C <sub>2</sub> (KJ/mol) | C <sub>3</sub> (KJ/mol) | C <sub>4</sub> (KJ/mol) | C <sub>5</sub> (KJ/mol) |
|--------------------|-------------------------|-------------------------|-------------------------|-------------------------|-------------------------|-------------------------|
| OM-CH2-CH2-OM      | 2.22267                 | 17.03651                | 8.29835                 | -31.2451                | 5.13025                 | -1.91522                |
| CH2-CH2-OM-CH2     | 1.60941                 | 19.79231                | -7.82474                | -15.7247                | 6.43215                 | -4.5435                 |
| CH2-CH2-OM-CH3     | 1.60941                 | 19.79231                | -7.82474                | -15.7247                | 6.43215                 | -4.5435                 |
| CGR-CGR-CGR-CGR    | 25.12                   | 0                       | -25.12                  | 0                       | 0                       | 0                       |
| CGR-CGR-CGRC-CGRC  | 25.12                   | 0                       | -25.12                  | 0                       | 0                       | 0                       |
| CGR-CGRC-CGR-CGR   | 25.12                   | 0                       | -25.12                  | 0                       | 0                       | 0                       |
| CGR-CGRC-CGRC-CGR  | 25.12                   | 0                       | -25.12                  | 0                       | 0                       | 0                       |
| CGRC-CGR-CGRC-CGR  | 25.12                   | 0                       | -25.12                  | 0                       | 0                       | 0                       |
| CGR-CGRC-CGR- CGRC | 25.12                   | 0                       | -25.12                  | 0                       | 0                       | 0                       |
| CGRC-CGR-CGR- CGRC | 25.12                   | 0                       | -25.12                  | 0                       | 0                       | 0                       |
| CGRC-CGR-CGR- CGR  | 25.12                   | 0                       | -25.12                  | 0                       | 0                       | 0                       |
| CGRC-CGRC-CGRC-CGR | 25.12                   | 0                       | -25.12                  | 0                       | 0                       | 0                       |
| CGRC-CGRC-CGR-CGRC | 25.12                   | 0                       | -25.12                  | 0                       | 0                       | 0                       |
| CGRC-CX-OH-HO      | 29.288                  | -8.368                  | -20.92                  | 0                       | 0                       | 0                       |
| CGR-CGRC-CX-OH     | 8.7864                  | 0                       | -8.7864                 | 0                       | 0                       | 0                       |
| CGR-CGRC-CX-O      | 8.7864                  | 0                       | -8.7864                 | 0                       | 0                       | 0                       |
| CGRC-CGRC-CX-OH    | 8.7864                  | 0                       | -8.7864                 | 0                       | 0                       | 0                       |
| CGRC-CGRC-CX-O     | 8.7864                  | 0                       | -8.7864                 | 0                       | 0                       | 0                       |
| HO-OH-CX-O         | 20.92                   | 0                       | -20.92                  | 0                       | 0                       | 0                       |
| H-CGRC-CGRC-H      | 25.12                   | 0                       | -25.12                  | 0                       | 0                       | 0                       |
| CX-CGRC-CGRC-H     | 25.12                   | 0                       | -25.12                  | 0                       | 0                       | 0                       |
| CX-CGRC-CGRC-CX    | 25.12                   | 0                       | -25.12                  | 0                       | 0                       | 0                       |
| CX-CGRC-CGR-CGR    | 25.12                   | 0                       | -25.12                  | 0                       | 0                       | 0                       |
| CX-CGRC-CGRC-CGR   | 25.12                   | 0                       | -25.12                  | 0                       | 0                       | 0                       |
| CX-CGRC-CGR-CGRC   | 25.12                   | 0                       | -25.12                  | 0                       | 0                       | 0                       |
| CX-CGRC-CGRC-CGRC  | 25.12                   | 0                       | -25.12                  | 0                       | 0                       | 0                       |
| H-CGRC-CGR-CGR     | 25.12                   | 0                       | -25.12                  | 0                       | 0                       | 0                       |
| H-CGRC-CGRC-CGR    | 25.12                   | 0                       | -25.12                  | 0                       | 0                       | 0                       |
| H-CGRC-CGR-CGRC    | 25.12                   | 0                       | -25.12                  | 0                       | 0                       | 0                       |
| H-CGRC-CGRC-CGRC   | 25.12                   | 0                       | -25.12                  | 0                       | 0                       | 0                       |

## Generation and Equilibration of Model Systems

For the construction of an initial configuration of a graphene-based polymer nanocomposite model system the following procedure is used: Having an equilibrated configuration of the corresponding bulk polymer we enlarge the simulation box in one dimension such that free space is created. Then we move the coordinates of the polymer melt in the same direction such that almost half of it is placed out of the simulation box. In the following a graphene sheet is put in the free space in a distance which ensures no overlaps with the polymer atoms and an *NPT* simulation run starts till the system reaches the desired density. Due to the application of periodic boundary conditions, this procedure results in a configuration of the nanocomposite where the graphene flake is surrounded by polymer chains, which is used as an initial configuration for our simulation run.

## Shape Analysis

The shape of the graphene layer can be characterized through the asphericity ( $a$ ) and prolateness ( $p$ ) parameters, which are obtained from the radius of gyration tensor.

In more detail, the asphericity ( $a$ ) is given by :  $a = \frac{(L_y - L_x)^2 + (L_z - L_x)^2 + (L_z - L_y)^2}{2(L_x + L_y + L_z)^2}$ , where  $L_c$

( $c=x,y,z$ ) are the three principal moments of the gyration tensor. The asphericity parameter attains values between 0 and 1, for a perfectly spherical object  $a=0$  and  $L_x=L_y=L_z$ .

The prolateness ( $p$ ) is given by:  $p = \frac{(2L_x - L_y - L_z)(2L_y - L_x - L_z)(2L_z - L_x - L_y)}{2(L_x^2 + L_y^2 + L_z^2 - L_xL_y - L_xL_z - L_yL_z)^{3/2}}$  and its values are in

the range  $-1 \leq p \leq 1$ ; for perfectly oblate objects  $p=-1$  and  $L_x < L_y = L_z$ , whereas for perfectly prolate objects  $p=1$  and  $L_x = L_y < L_z$ . Values for  $a$  and  $p$  for the pristine and functionalized nanographene flakes at  $T = 450K$  are presented in Table SI-3

**Table SI-3:** Asphericity ( $a$ ), prolateness ( $p$ ) and the average second moment of the out of plane displacement, spatially averaged over all the atoms of the sheet (amplitude of rippling), for various simulated systems.

| System         | $A$              | $P$              | $d_{mean} = \sqrt{\langle d^2 \rangle}$ (Å) |
|----------------|------------------|------------------|---------------------------------------------|
| $G_{20}/PE$    | $0.19 \pm 0.07$  | $-0.61 \pm 0.50$ | 0.610                                       |
| $G_{50}/PE$    | $0.23 \pm 0.01$  | $-0.87 \pm 0.24$ | 0.892                                       |
| $G_{80}/PE$    | $0.24 \pm 0.008$ | $-0.90 \pm 0.14$ | 1.236                                       |
| $G_H/PE$       | $0.23 \pm 0.02$  | $-0.85 \pm 0.26$ | 0.624                                       |
| $G_{COOH}/PE$  | $0.24 \pm 0.02$  | $-0.61 \pm 0.32$ | 0.622                                       |
| $G_H/PEO$      | $0.23 \pm 0.01$  | $-0.88 \pm 0.18$ | 0.626                                       |
| $G_{COOH}/PEO$ | $0.23 \pm 0.01$  | $-0.76 \pm 0.24$ | 0.639                                       |

Although rippling of the nanographene flakes in the nanocomposites, induce continuous changes in their shape, values of Table SI-3 predict a shape closely described by an oblate ellipsoid (in the limit of a thin disk).

### Amplitude of rippling

In the fourth column of Table SI-3 the data for the average amplitude of the out of plane displacement of all C atoms in the nanographene layer are reported. Comparing nanographene flakes of the same dimensions (i.e.,  $(4.9 \times 5.1) \text{ nm}^2$ ) there is an obvious suppress of rippling in functionalized sheets. Furthermore bigger ripples are formed in the bigger graphene flakes.

1. B. Hess, C. Kutzner, D. van der Spoel and E. Lindahl, *J Chem Theory Comput* **4** (3), 435-447 (2008).
2. M. G. Martin and J. I. Siepmann, *J Phys Chem B* **102** (14), 2569-2577 (1998).
3. J. Fischer, D. Paschek, A. Geiger and G. Sadowski, *J Phys Chem B* **112** (8), 2388-2398 (2008).
4. J. H. Walther, R. Jaffe, T. Halicioglu and P. Koumoutsakos, *J Phys Chem B* **105** (41), 9980-9987 (2001).
5. Y. N. Pandey, A. Brayton, C. Burkhardt, G. J. Papakonstantopoulos and M. Doxastakis, *J Chem Phys* **140** (5), 054908 (2014).
6. W. L. Jorgensen, D. S. Maxwell and J. Tirado-Rives, *J Am Chem Soc* **118** (45), 11225-11236 (1996).
7. N. Chakrabarti, C. Neale, J. Payandeh, E. F. Pai and R. Pomes, *Biophys J* **98** (5), 784-792 (2010).
